# Supplementary material for: Design of combination therapy for engineered bacterial therapeutics in non-small cell lung cancer
Source: Research Square preprint supplement (doi:10.21203/rs.3.rs-2085639/v1), 2022-09-27
Supplement: Supplementary file [file 3ae28b564f39dce227ca478c.pdf]

Supplementary information

# **Design of combination therapy for engineered bacterial therapeutics in non-small cell lung cancer**

**Dhruba Deb<sup>1</sup>, Yangfan Wu<sup>1</sup>, Courtney Coker<sup>1</sup>, Tetsuhiro Harimoto<sup>1</sup>, Ruoqi Huang<sup>1</sup>, Tal Danino<sup>1,2,3</sup>**

<sup>1</sup>Department of Biomedical Engineering, <sup>2</sup>Herbert Irving Comprehensive Cancer Center, <sup>3</sup>Data Science Institute, Columbia University, New York, NY 10027, USA. Electronic address: [td2506@columbia.edu](mailto:td2506@columbia.edu)

# Supplementary Figures

**Suppl. Fig. 1**

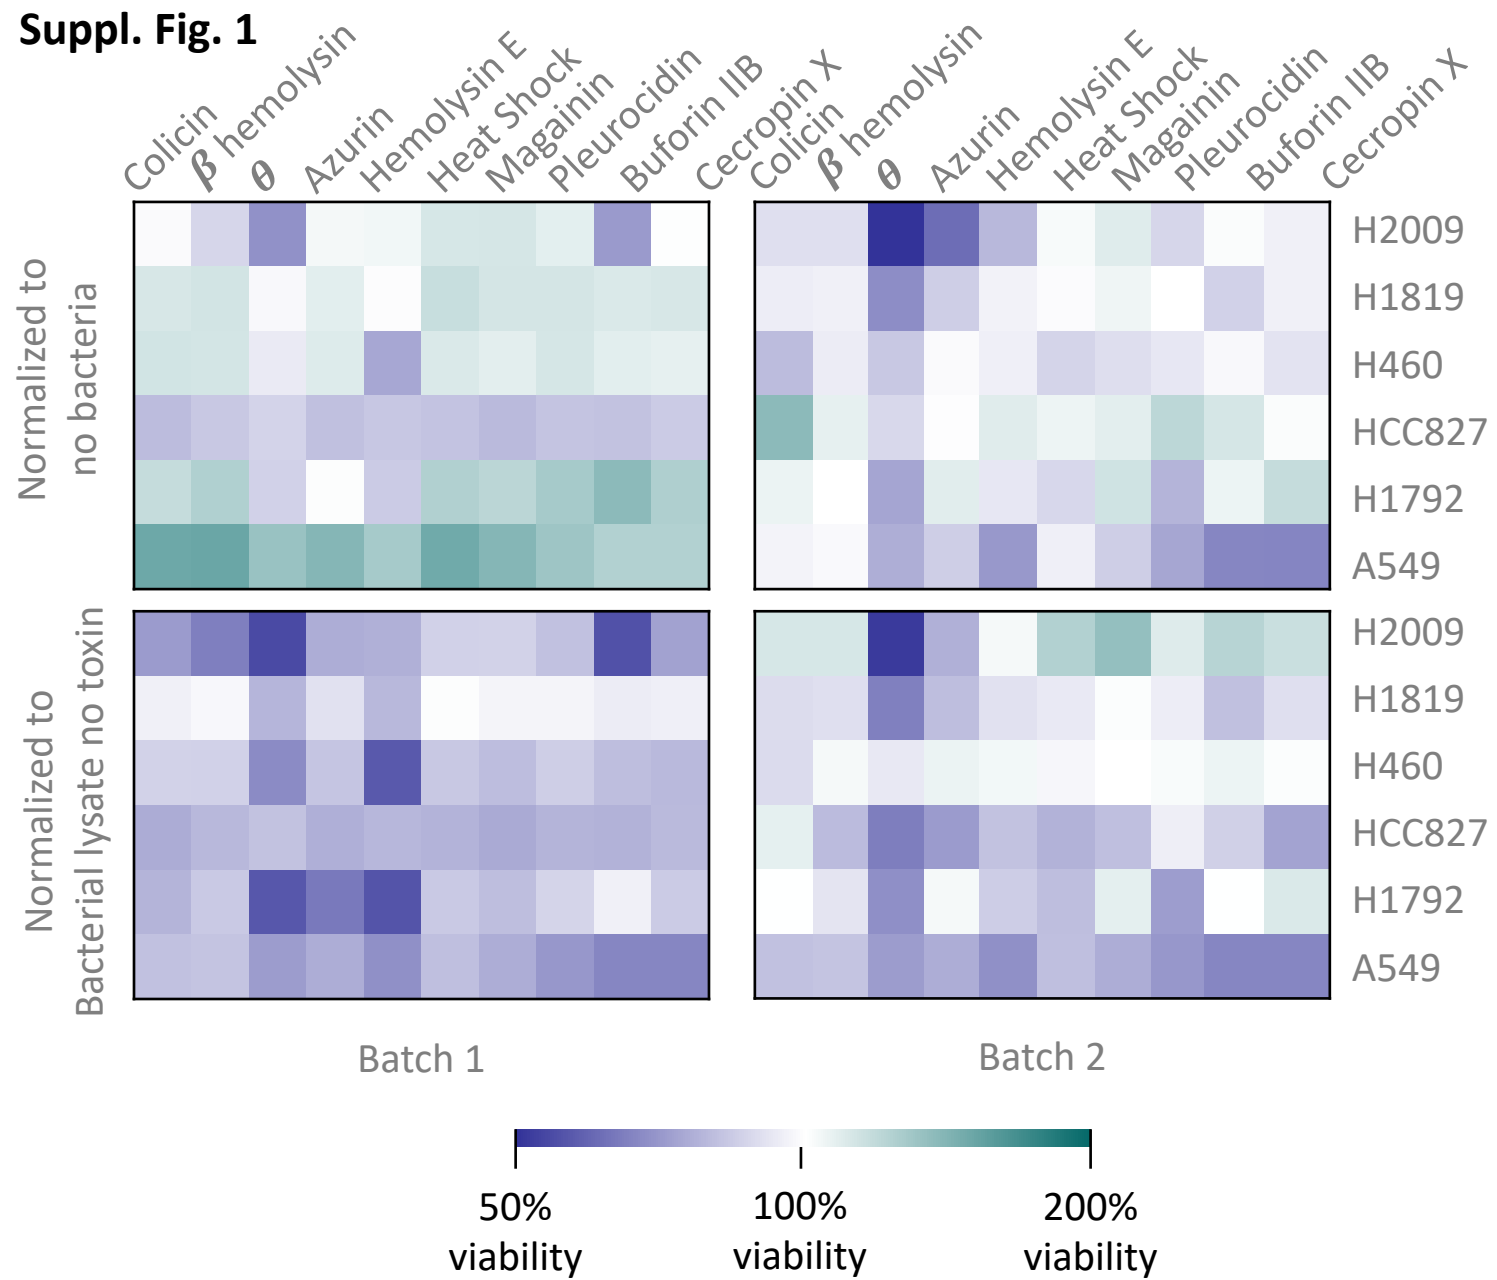

**Suppl. Fig. 1: Response of NSCLC lines to bacterially secreted toxins to monolayer assay in batch replicates**  
 2D monolayer screen using MTT viability assay to study the response of 6 NSCLC lines to 10 previously engineered bacterially secreted toxins. For each batch, fresh lysates of engineered *S. typhimurium* EHL1301 were prepared and were normalized for optical density before adding to the NSCLC monolayer cultures grown in 96-well flat bottom plates. The heatmap represents the median of percent viability (n=8 for plate replicates). Top row represents data normalized to no bacteria control. Bottom row represents data normalized to bacterial lysate without engineered toxins.

**Suppl. Fig. 2**

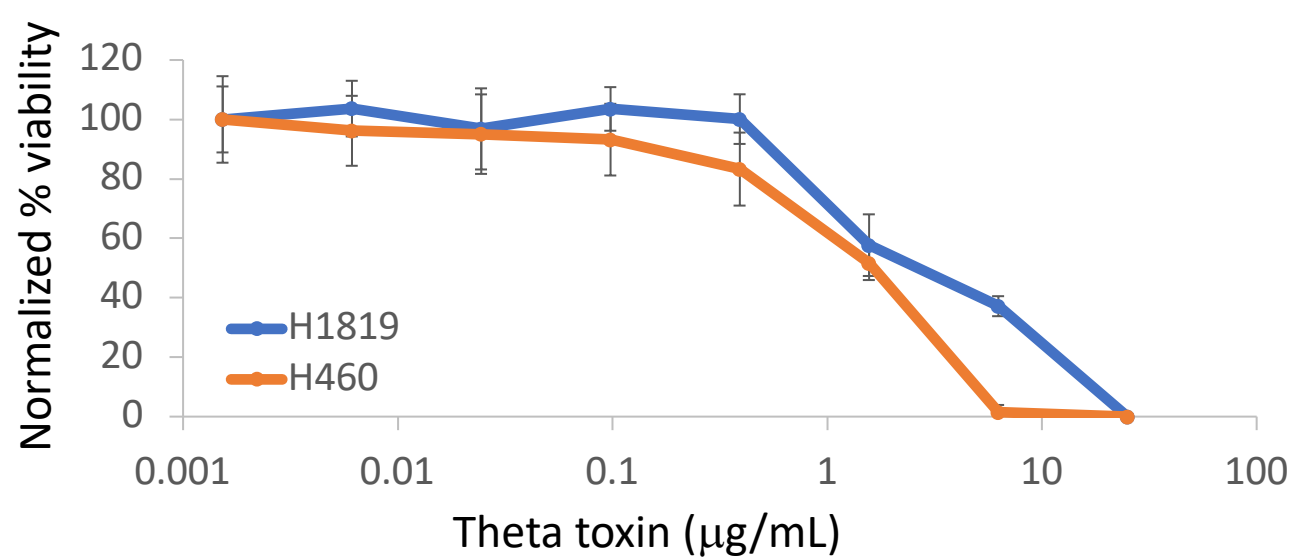

**Suppl. Fig. 2: Response of NSCLC spheroids to purified theta toxin (ATCC)**

Response of 2 NSCLC spheroids to purified Theta toxin purchased from ATCC assessed by Cell Titer Glo 3D. Error bars represent standard deviation (n=3). Toxin concentration is in  $\mu\text{g}/\text{mL}$  unit. The toxin was dissolved in spheroid growth media and added after the spheroids developed hypoxic cores. Luminescence was measured after 96 hours of treatment.

Suppl. Fig. 3

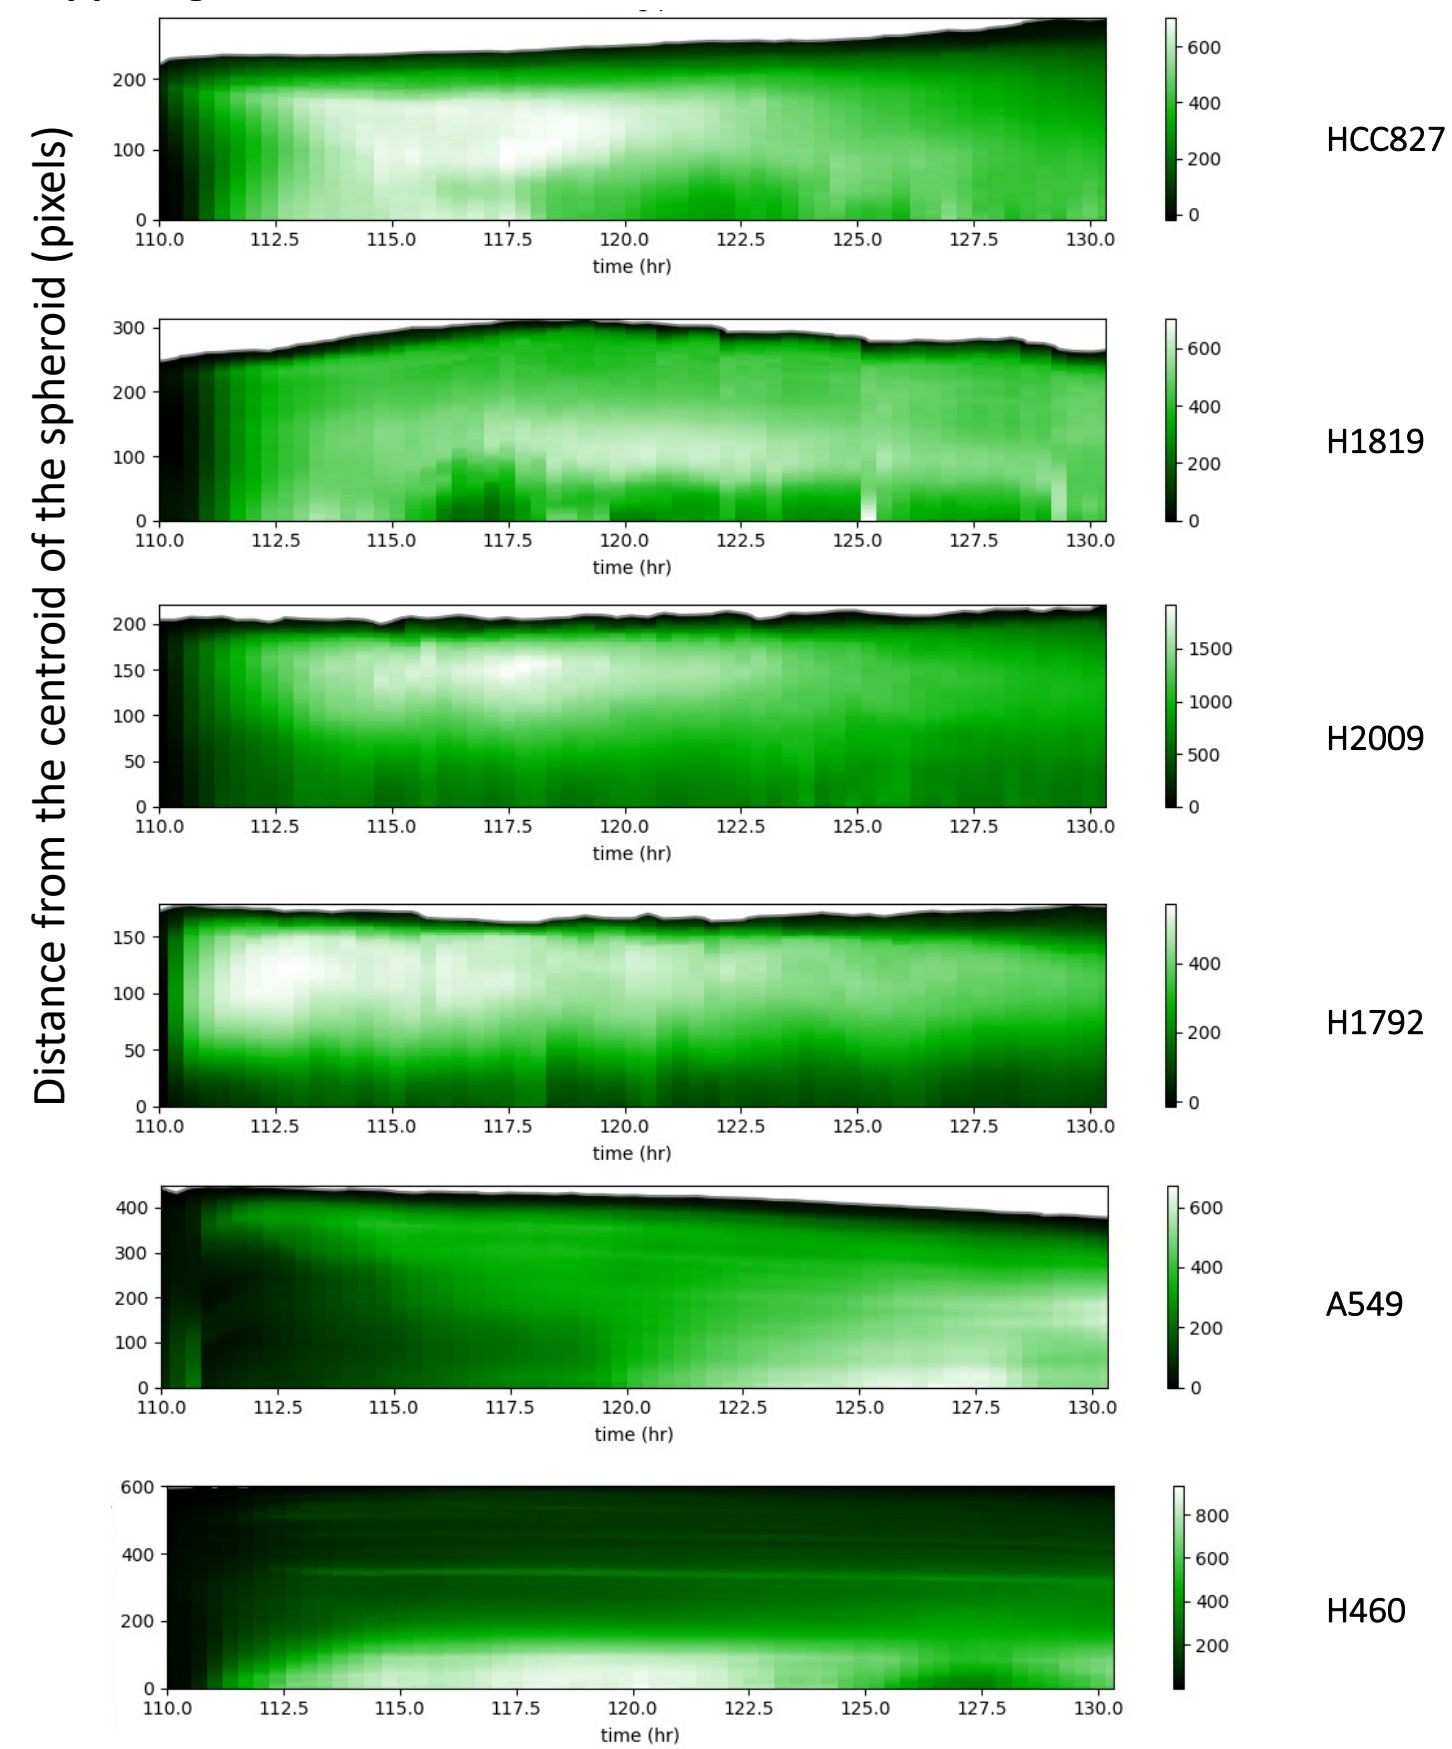

Suppl. Fig. 3: Spatio-temporal dynamics of Salmonella colonizing in NSCLC spheroids

*S. typhimurium*-spheroid co-cultures were prepared following the protocol in the methods section. The GFP signal from *S. typhimurium* was measured using fluorescence microscopy and the spheroids were imaged with brightfield channel using live cell microscopy. Image analysis was performed to measure the distance of the *S. typhimurium* (GFP) from the center of the spheroid. Representative plots of this value over time are shown here.

Suppl. Fig. 4

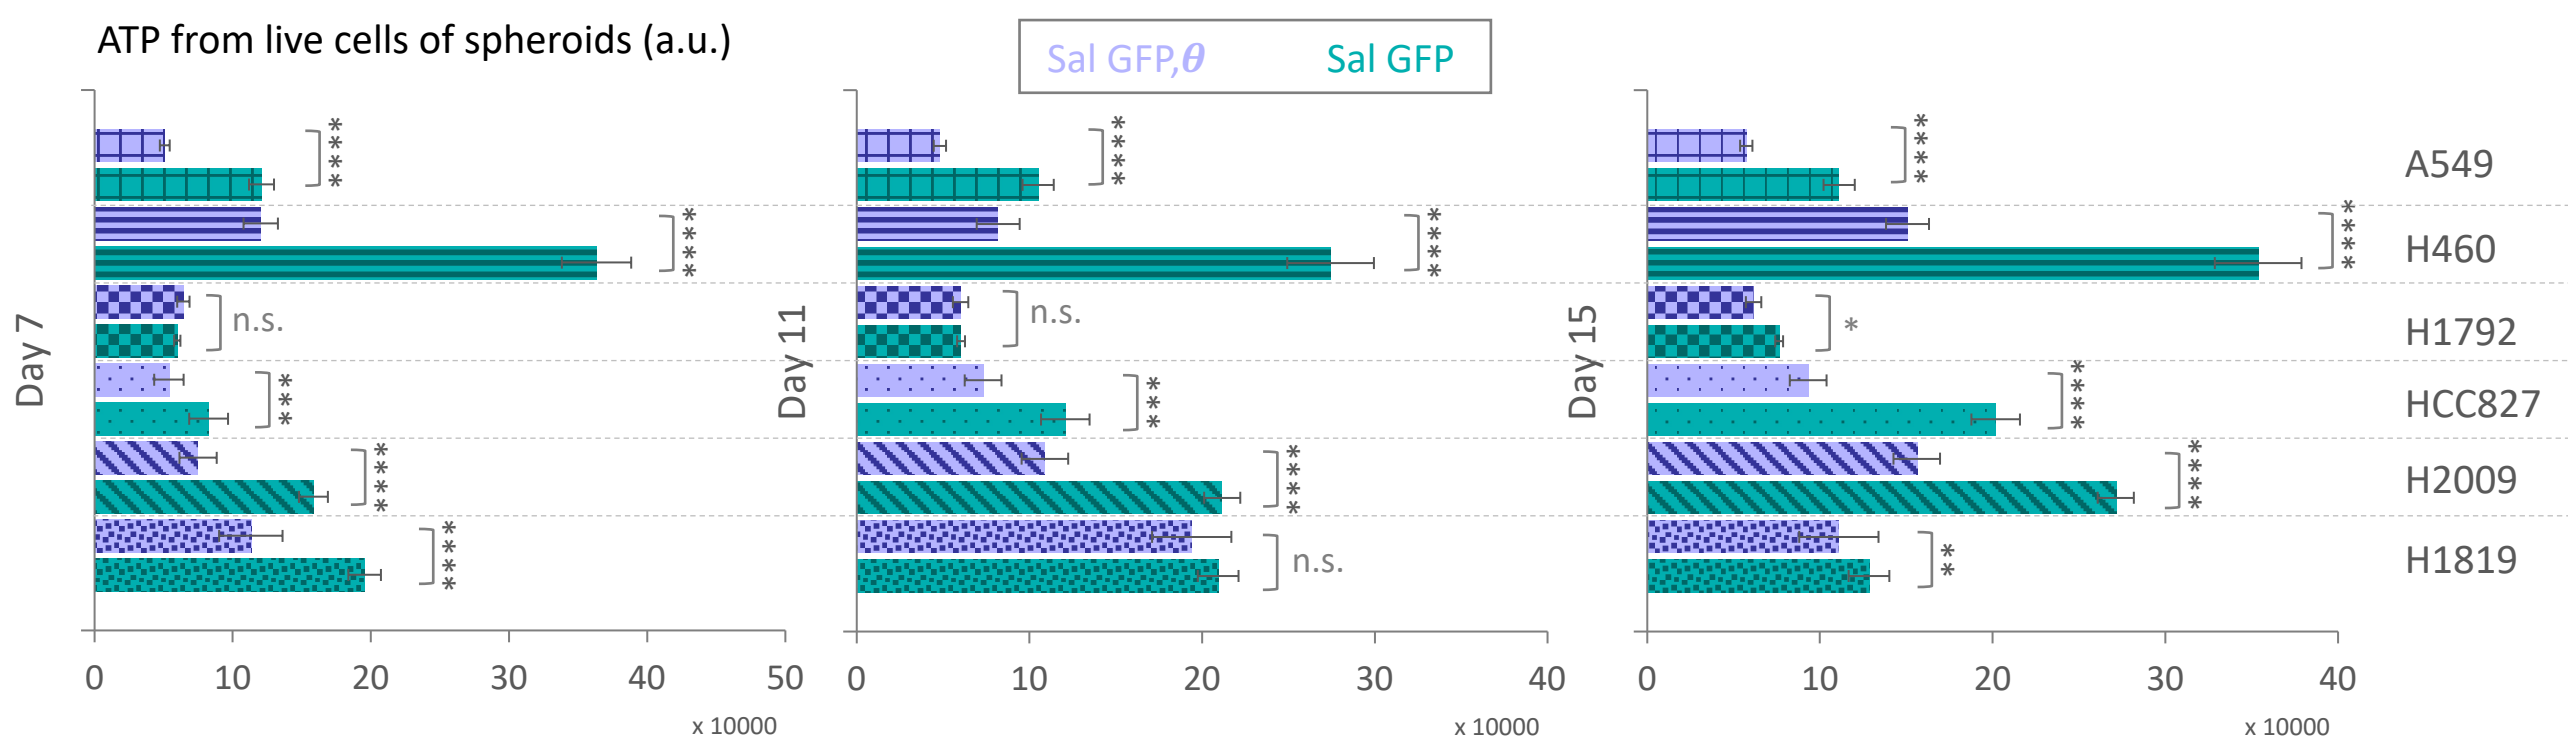

Suppl. Fig. 4: Viability of NSCLC- *S. typhimurium* co-culture spheroids using Cell Titer Glo 3D assay at day 7, 11 and 15 (n=6) after induction of Theta toxin secretion. Significant change (\*\*\*\* =  $p < 0.0001$ , \*\*\* =  $p < 0.001$ , \*\* =  $p < 0.01$ , \* =  $p < 0.5$ , n.s. = not significant) was determined by paired, two-tail t-test, and error bars represent standard deviation

Suppl. Fig. 5

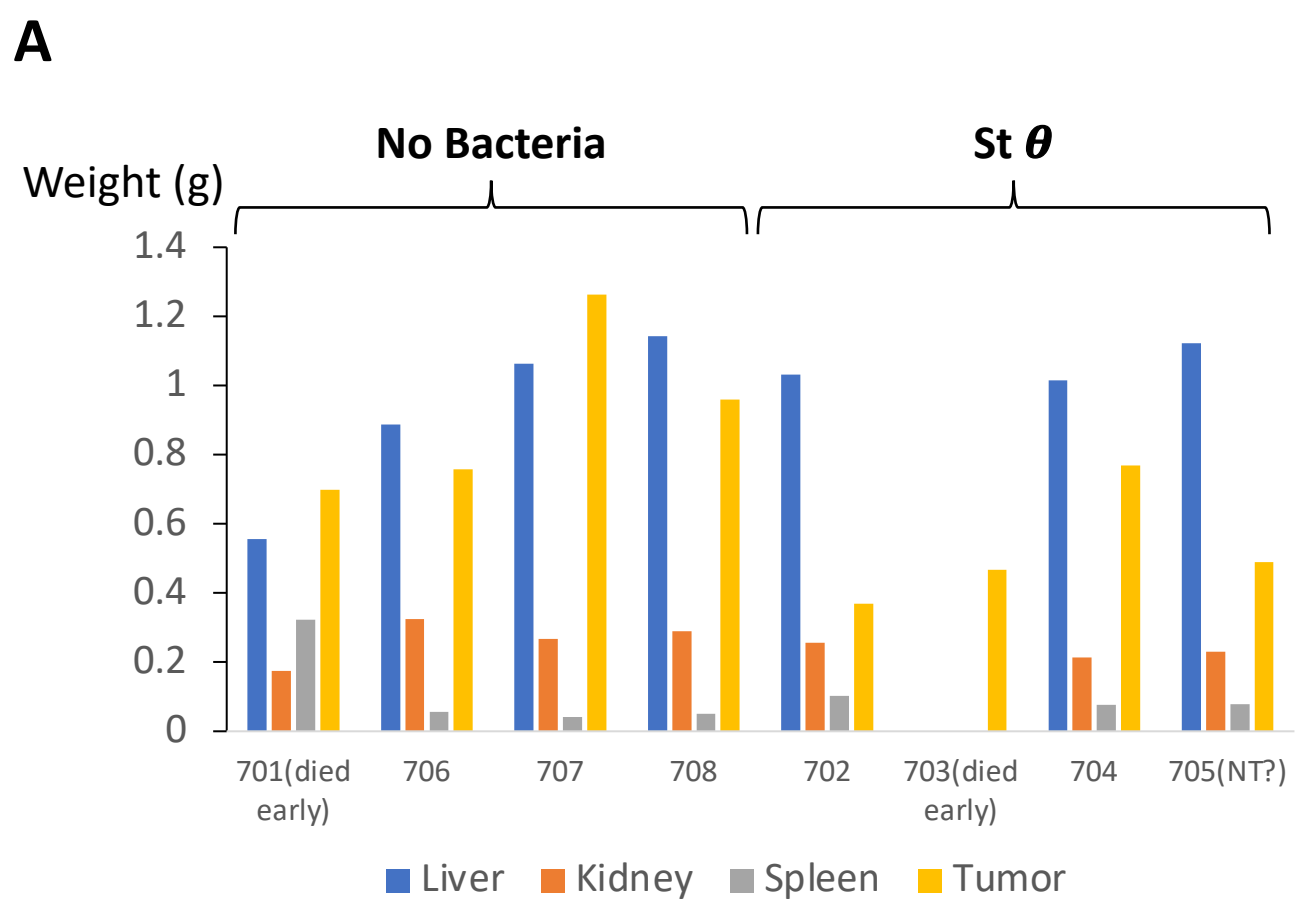

**B**

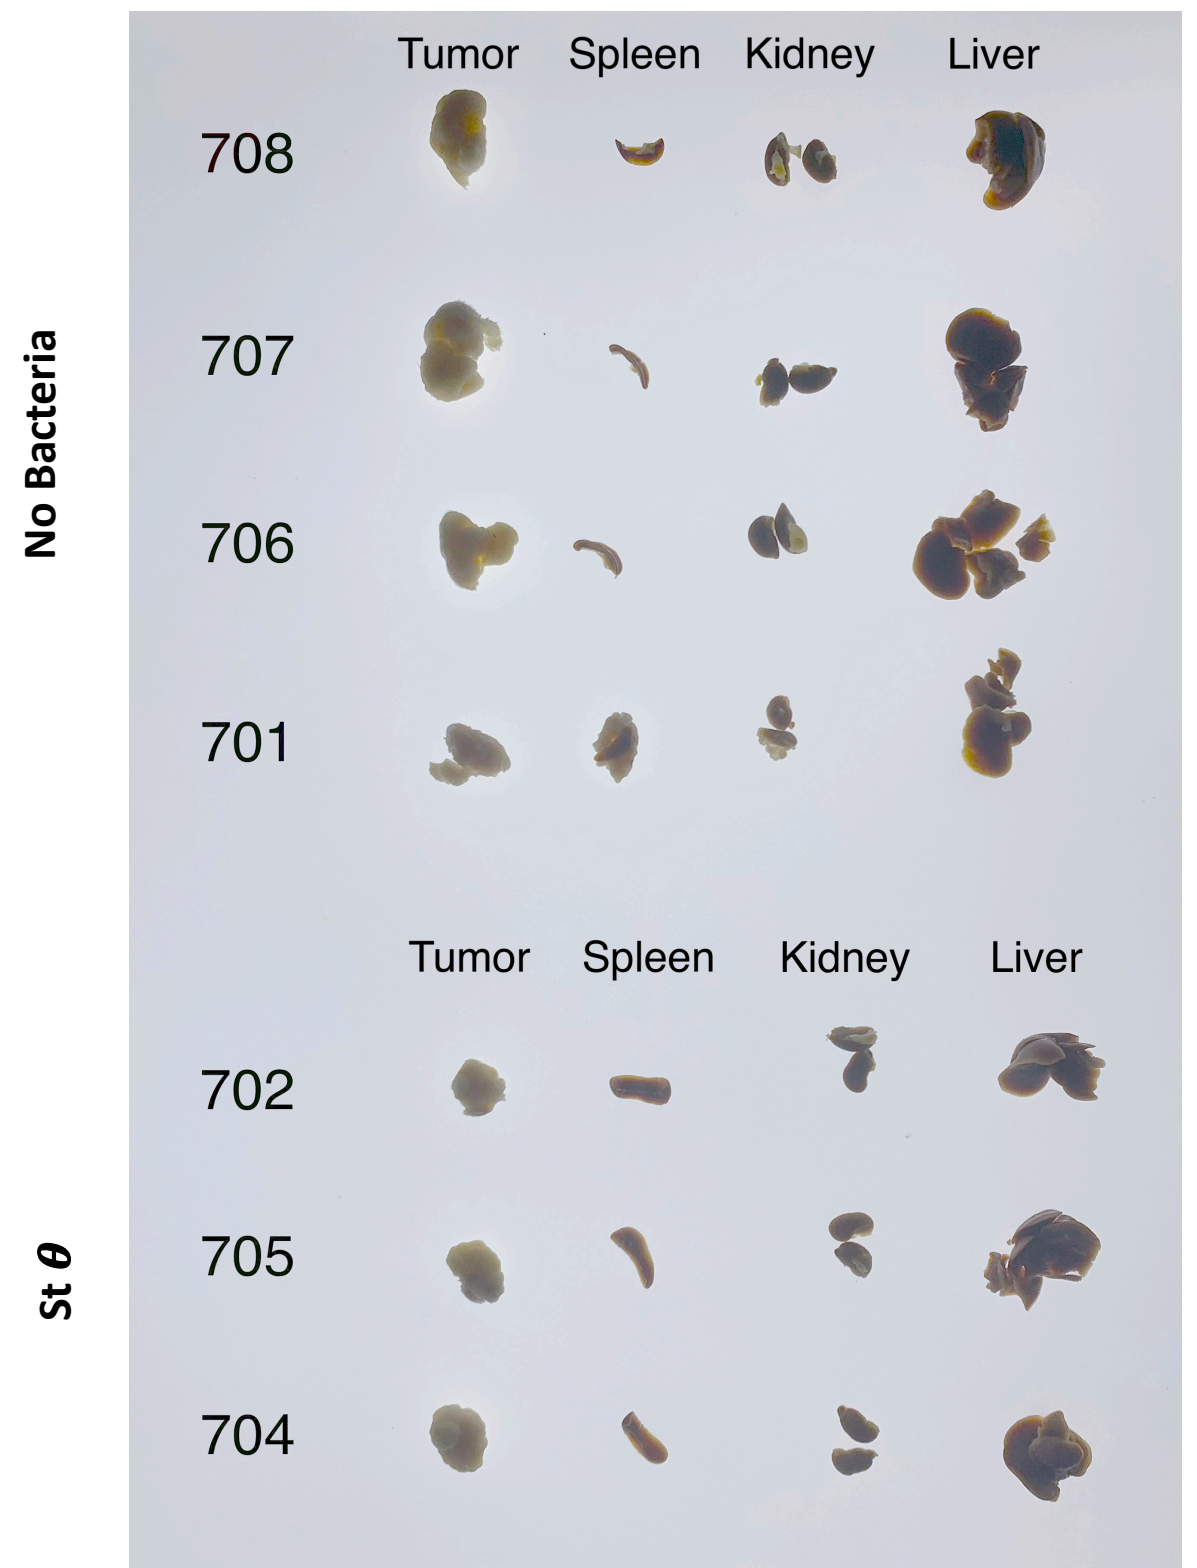

**Suppl. Fig. 5: Weight and photo of resected H460 subcutaneous tumors and vital organs after euthanasia**  
 Following euthanasia, tumors and vital organs (liver, spleen, kidney) were collected, gently washed with 70% ethanol, photographed and weighed. For a mouse that died early overnight, vital organs could not be collected. One mouse died during the schedule of treatment.

Suppl. Fig. 6

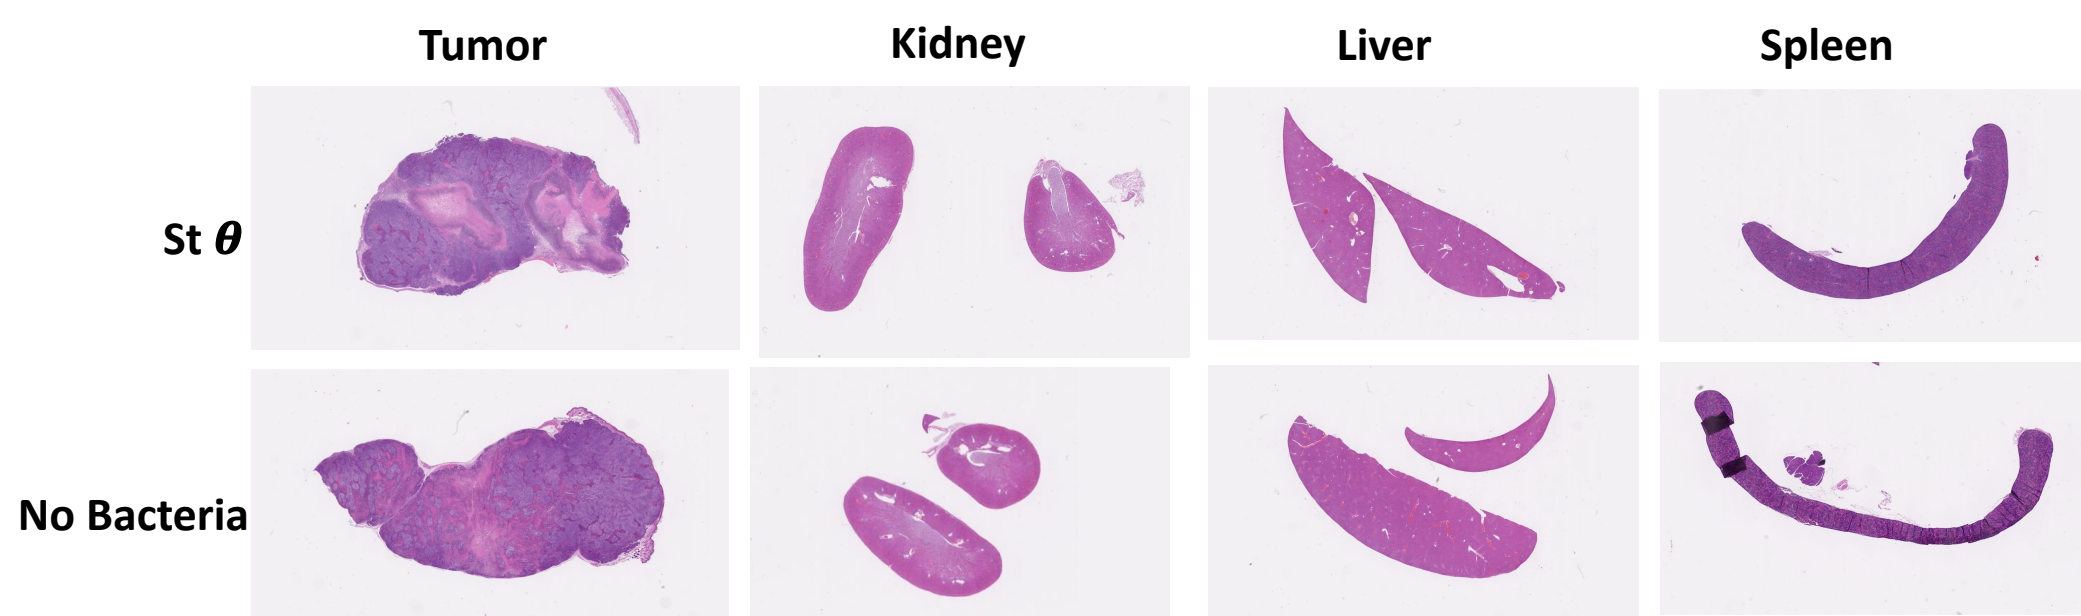

**Suppl. Fig. 6: Histology images of tumors and vital organs from NSG mice with H460 subcutaneous tumors and injected with or without bacteria**  
 Representative histology images of formalin-fixed paraffin-embedded and sectioned tumor, liver, kidney and spleen stained with H&E

Suppl. Fig. 7

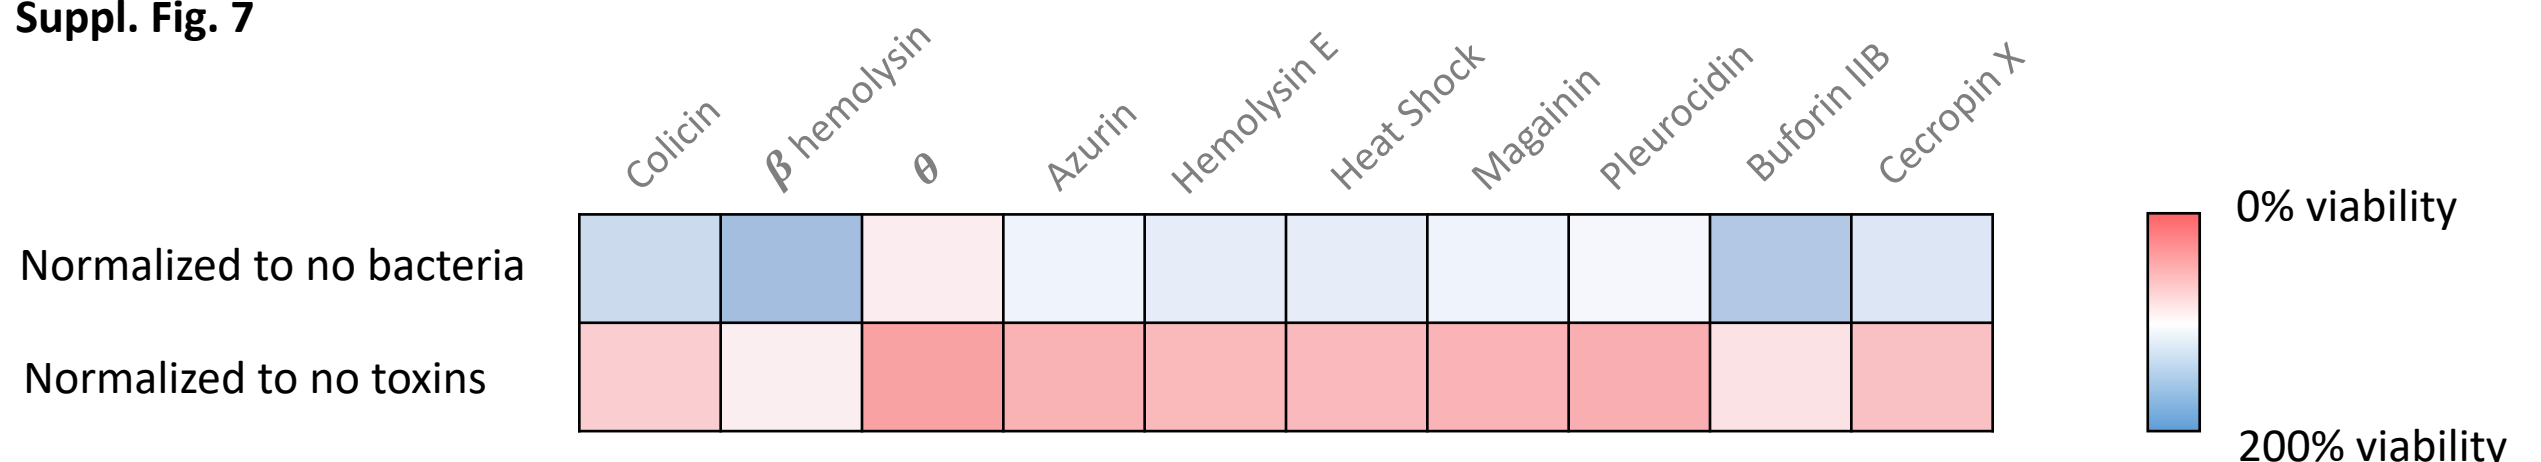

**Suppl. Fig. 7: Response of Human Bronchial Epithelial cells (HBECs) lines to bacterially secreted toxins to monolayer assay in batch replicates**  
 Fresh lysates of engineered *Salmonella typhimurium* EHL1301 were prepared and were normalized for optical density before adding to the NSCLC monolayer cultures grown in 96-well flat bottom plates. The heatmap represents the median of percent viability (n=8 for plate replicates). Top row represents data normalized to no bacteria control. Bottom row represents data normalized to bacterial lysate without engineered toxins.



**Suppl. Fig.10**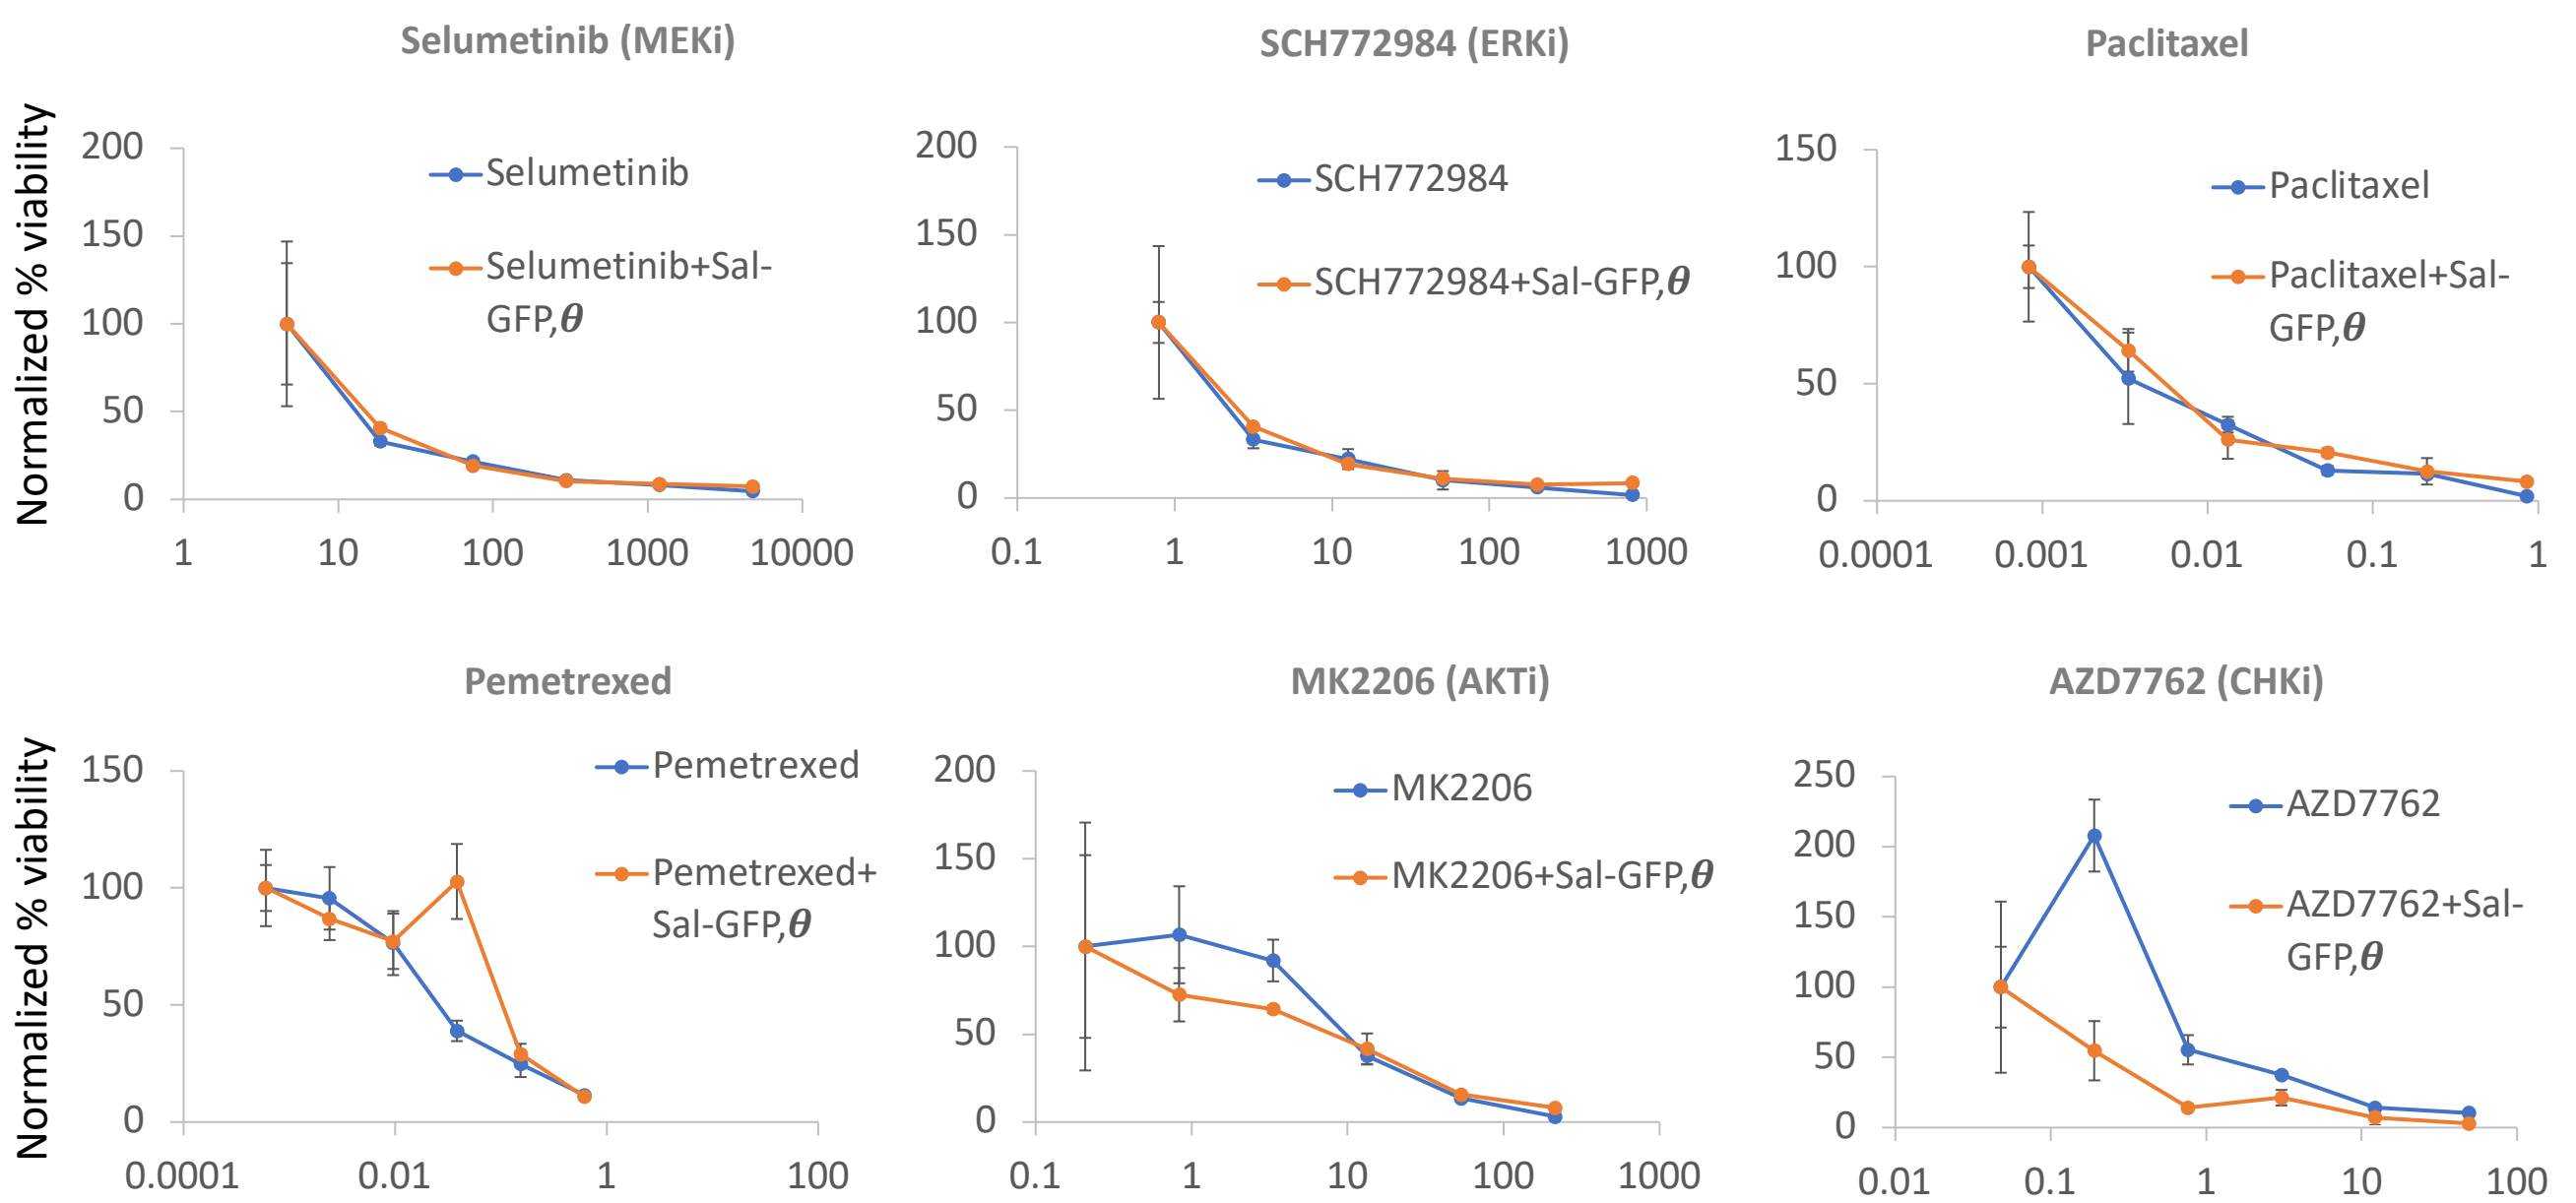

**Suppl. Fig. 10: Viability of mouse lung cancer spheroids (with genetically modified TP53 and KRAS), treated with 7 small molecule inhibitors targeting specific signaling identified by GSEA analysis of H460 and H1819, under 2 treatment conditions: 1) Drug only, 2) Drug and bacterially secreted  $\theta$  in co-culture** After the mouse spheroid and *S. typhimurium* co-cultures were established, AHL was added to induce  $\theta$  toxin secretion by the *S. typhimurium* and small molecule inhibitors were added. Error bars represent standard error (n=6). Y-axis represents drug concentrations in  $\mu\text{M}$  unit.

**Suppl. Fig.11**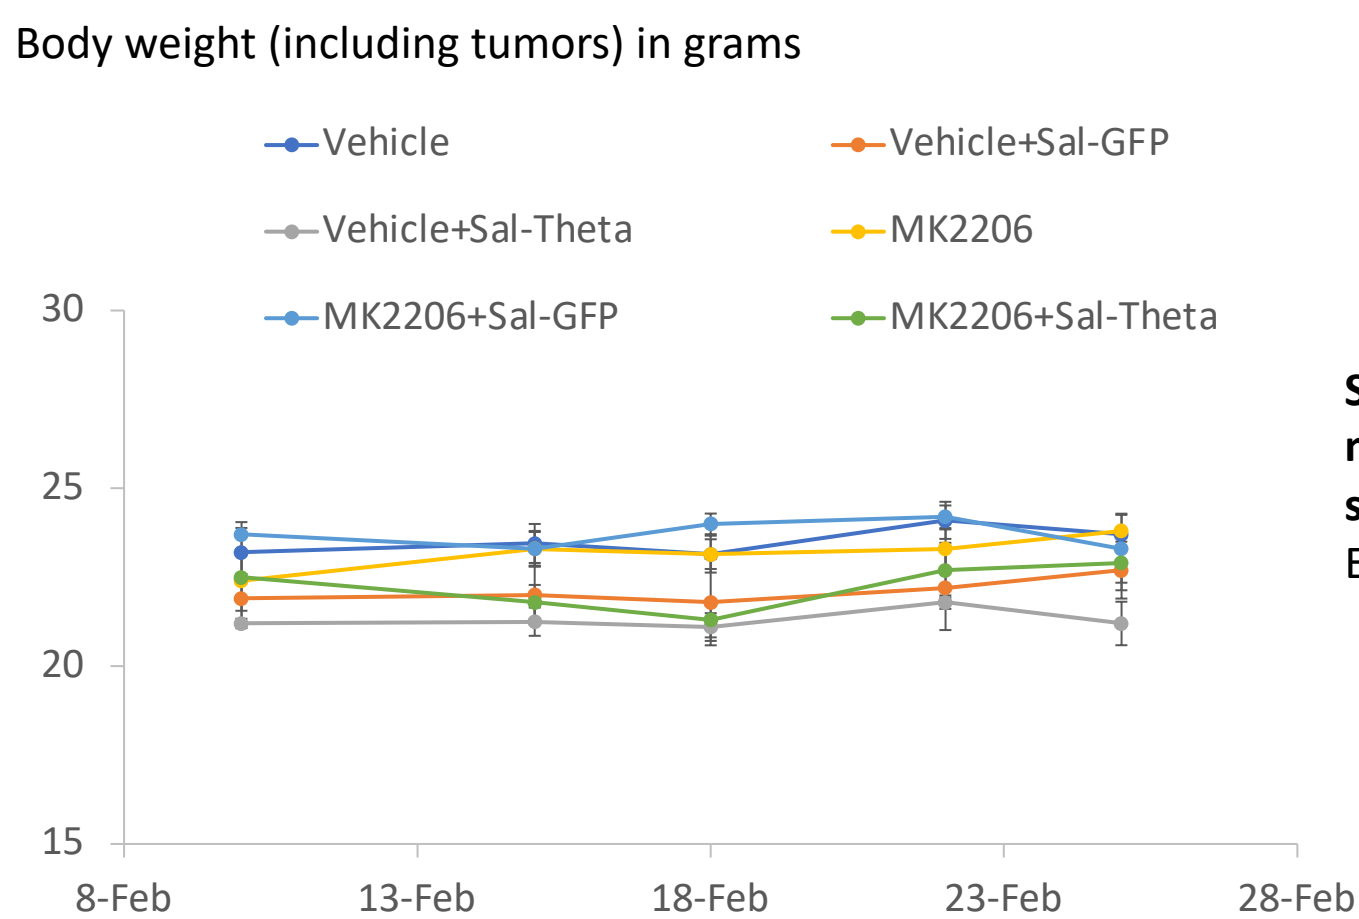

**Suppl. Fig. 11: Body weight of mice measured throughout the treatment schedule** Error bars represent standard error (n=3 or 4)
